# Supplementary material for: Clinical benefits of MRI-guided freehand biopsy of small focal liver lesions in comparison to CT guidance
Source: PubMed Central journal article supplement (PMC11364707; doi:10.1007/s00330-024-10623-9), 2024-02-06
Supplement: 330_2024_10623_MOESM1_ESM.pdf [file 330_2024_10623_MOESM1_ESM.pdf]

# **Clinical Benefits of MRI-guided Freehand Biopsy of Small Focal Liver Lesions in comparison to CT guidance**

**Electronic Supplementary Material (ESM)**

**Supplemental Table 1.** Indications for MRI guidance of liver biopsy

|                                                                        | MRI-guided cohort (n=30)<br>Number |
|------------------------------------------------------------------------|------------------------------------|
| Small lesion size <20 mm                                               | 30 (100%)                          |
| Suspected poor visibility in other modalities                          | 8 (%)                              |
| Unfavorable lesion location (e.g. hepatic dome)                        | 5 (16.7%)                          |
| Negative results of previous biopsy procedures using CT or US guidance | 12 (40%)                           |

<sup>1</sup> e.g.="exempli gratia" (lat.), for example; CT=computed tomography; US=ultrasound
